# Supplementary material
Source: Springer Nature journal article supplement (https://www.springermedizin.de/resource/supplementary/12990_2012_561_MOESM1_ESM.pdf/9613638)

**A**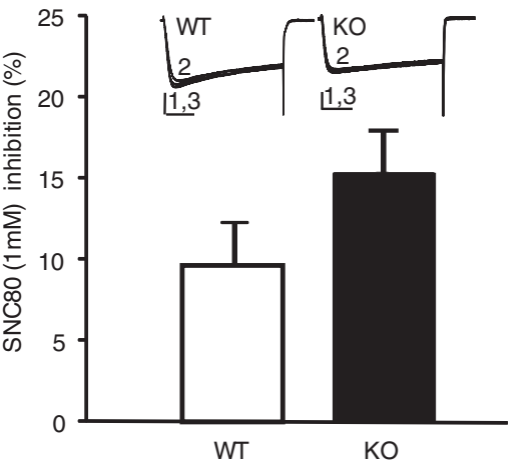**B**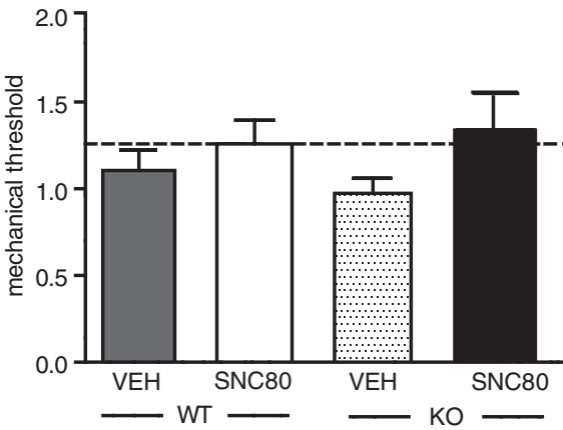

Supplement: MOESM1 [file 9613638]
